# Supplementary material
Source: Royal Society of Chemistry journal article supplement (doi:10.1039/d6ce00129g)
Supplement: d6ce00129g1.pdf [file d6ce00129g1.pdf]

## Supporting Information

### **Carbamoyl Azide-Drug Conjugates as Supramolecular Gelators: Design, Synthesis, Crystal Structures and Anti-Melanoma Property**

Manoj Kumar Baskey<sup>a</sup>, Subhajit Ghosh<sup>a</sup>, Sabir Ahmed<sup>a</sup> and Parthasarathi Dastidar<sup>a\*</sup>

<sup>a</sup>School of Chemical Sciences, Indian Association for the Cultivation of Science (IACS), 2A and 2B, Raja S. C. Mullick Road, Jadavpur, Kolkata - 700032, West Bengal, India

\*e-mail: [ocpd@iacs.res.in](mailto:ocpd@iacs.res.in)

### Table of Contents

| Sl. No. | Contents                                                                    | Page no. |
|---------|-----------------------------------------------------------------------------|----------|
| 1.      | Carbamoyl azide synthesis (scheme 1)                                        | 2        |
| 2.      | <sup>1</sup> H NMR and <sup>13</sup> C NMR of carbamoyl azides(Fig. S1-S10) | 2-7      |
| 3.      | HR-Mass of Carbamoyl azides(Fig. S11-S15)                                   | 7-9      |
| 4.      | FT-IR of all azide and corresponding precursor acids(Fig. S16)              | 10       |
| 5.      | Single Crystal XRD analysis( Tab. S1, Fig. S17- Tab. S6, Fig. S21)          | 10-14    |
| 6.      | Reaction scheme and mechanism(Fig. S22)                                     | 15       |
| 7.      | PXRD plots of azides(bulk vs. simulated) (Fig. S23)                         | 16       |
| 8.      | Gelation, M.G.C and tanδ (G''/G') table ( Tab. S7- Tab. S8)                 | 16-17    |
| 9.      | Rheological Experiments of gels(Fig. S24)                                   | 17       |
| 10.     | FT-IR spectra of xerogel and Xerogel-incubated of Diclo-Az(Fig. S25)        | 18       |
| 11.     | PXRD Patterns (xerogel vs. bulk, xerogel vs. simulated) (Fig. S26)          | 19       |
| 12.     | Biological Studies(Fig. S27)                                                | 20       |
| 13.     | Rheo-reversibility of Nap-Az (4 wt %, DMSO/water, 1:1:, v/v) (Fig. S28)     | 20       |

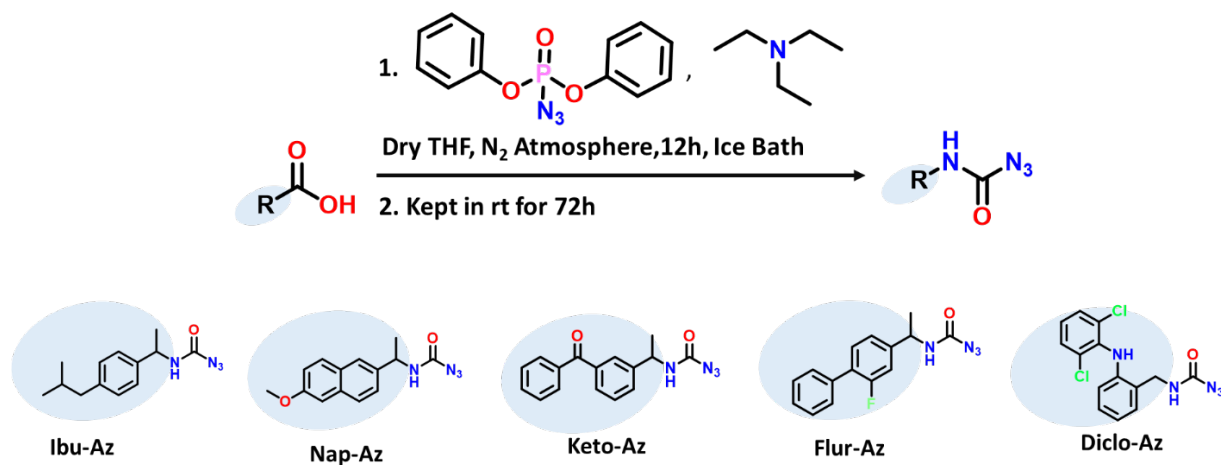

**Scheme 1:** Synthetic strategy for carbamoyl azide **Ibu-Az**, **Nap-Az**, **Keto-Az**, **Flur-Az** and **Diclo-Az**.

Caution: Carbamoyl azides are sensitive to excessive heat and shock as they have potential for explosive decomposition and therefore, these compounds should be handled with care.

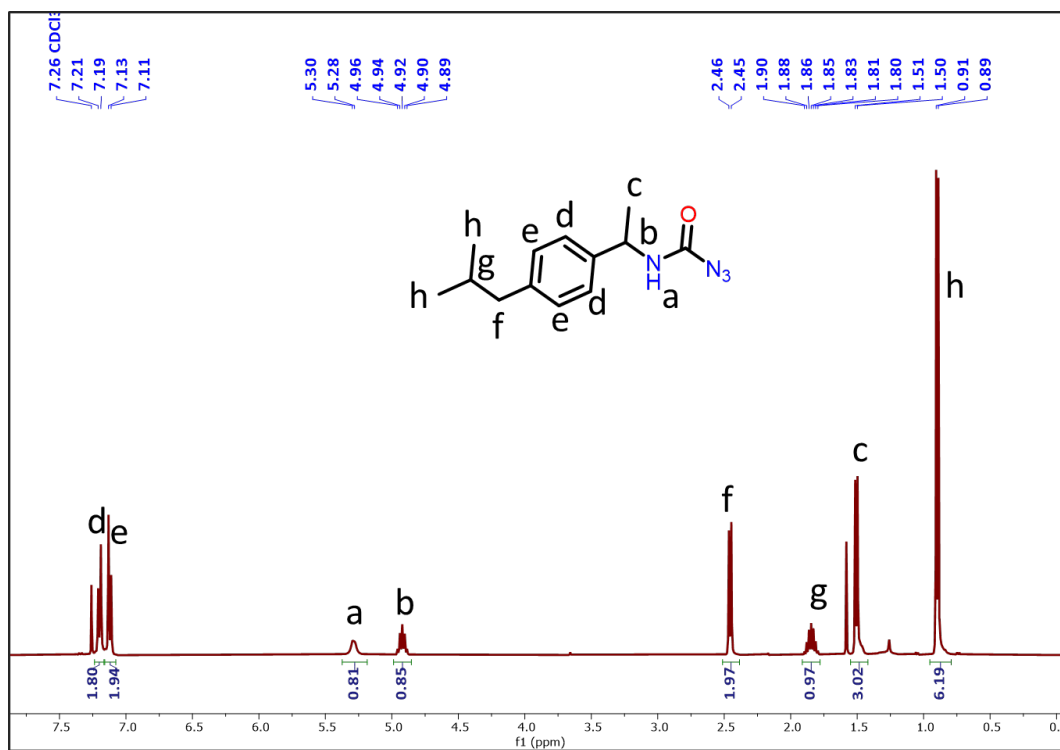

**Fig. S1:**  $^1\text{H}$  NMR of Ibu-Az in  $\text{CDCl}_3$ .

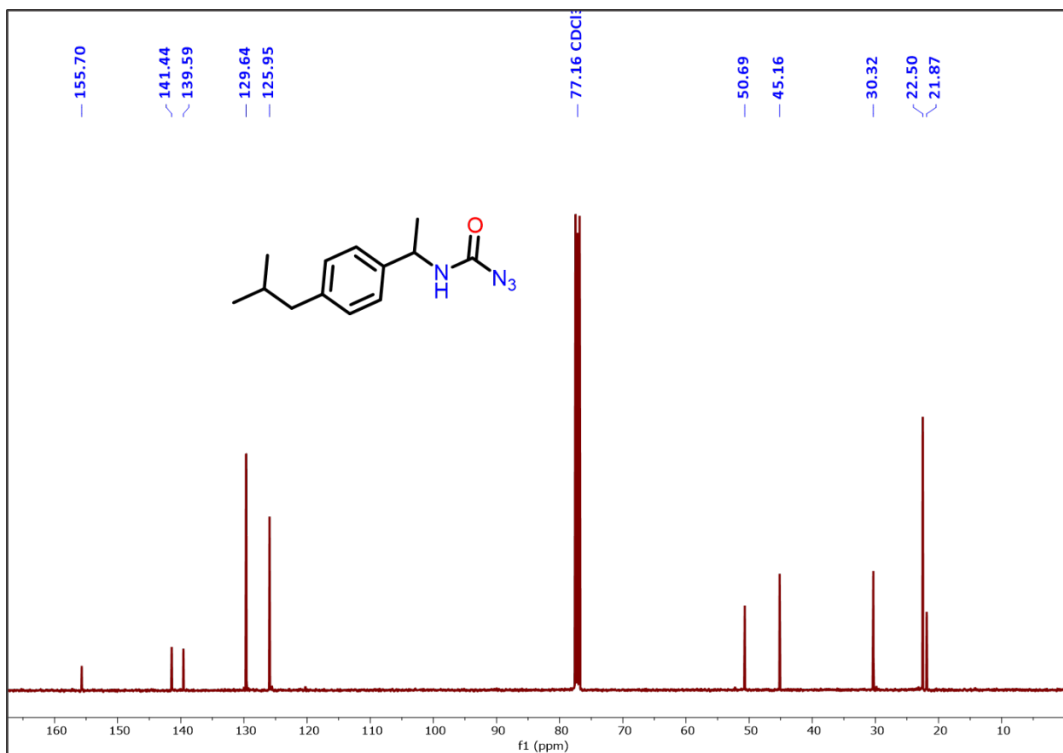

Fig. S2: <sup>13</sup>C NMR of Ibu-Az in CDCl<sub>3</sub>.

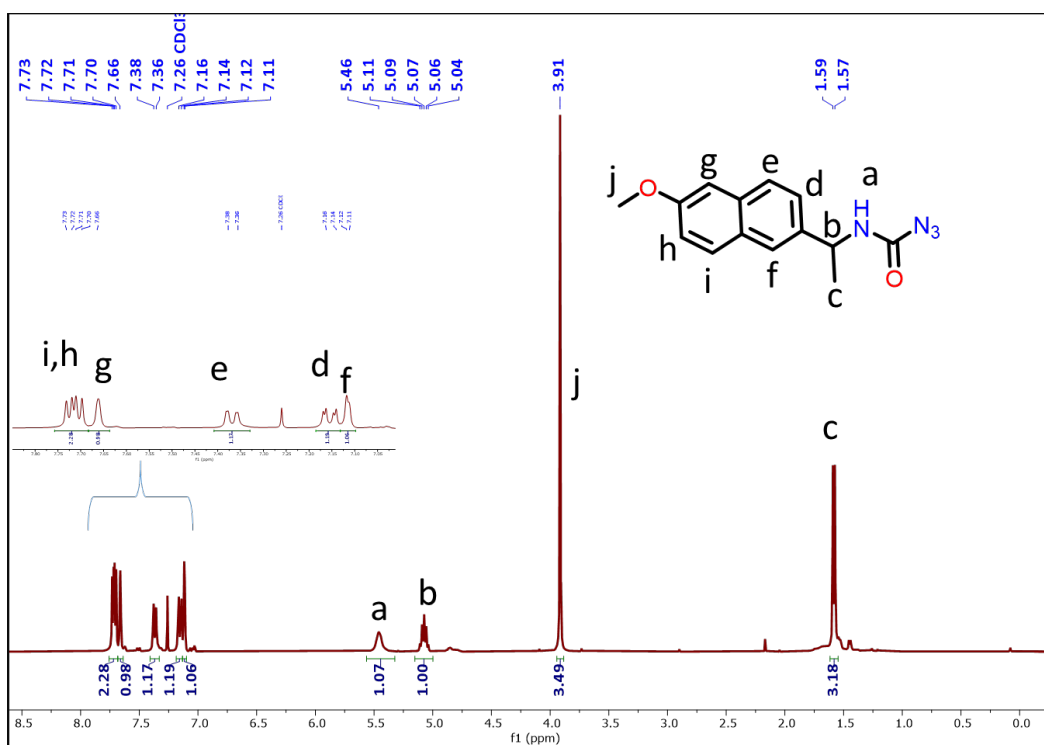

Fig. S3: <sup>1</sup>H NMR of Nap-Az in CDCl<sub>3</sub>.

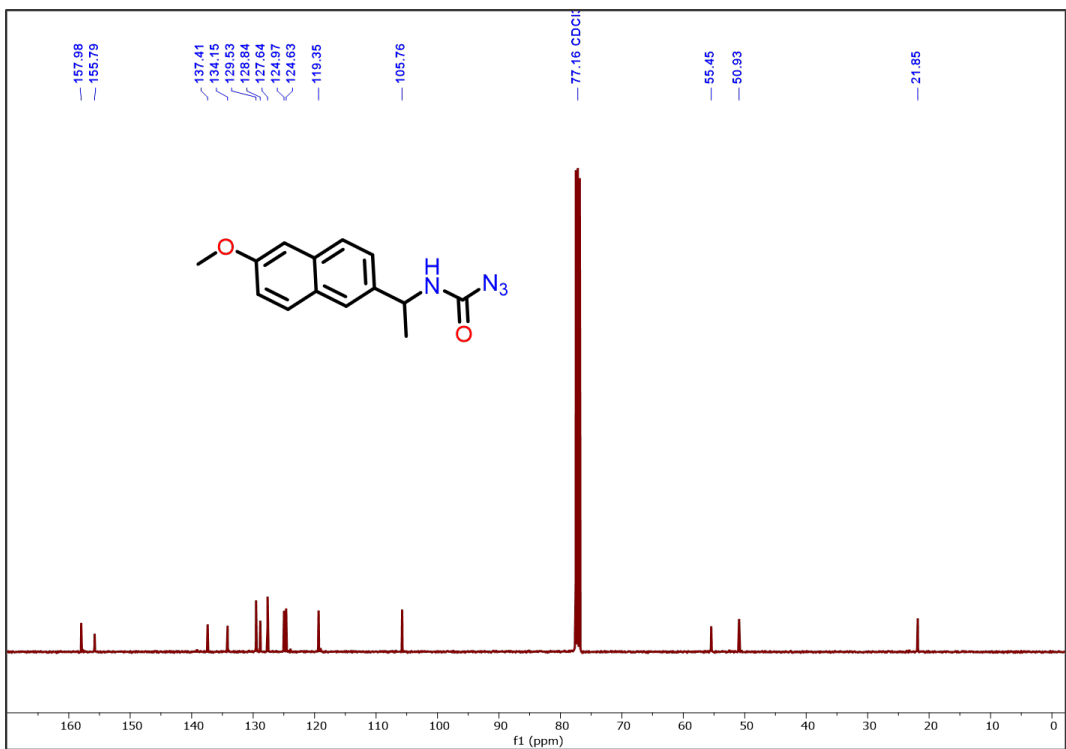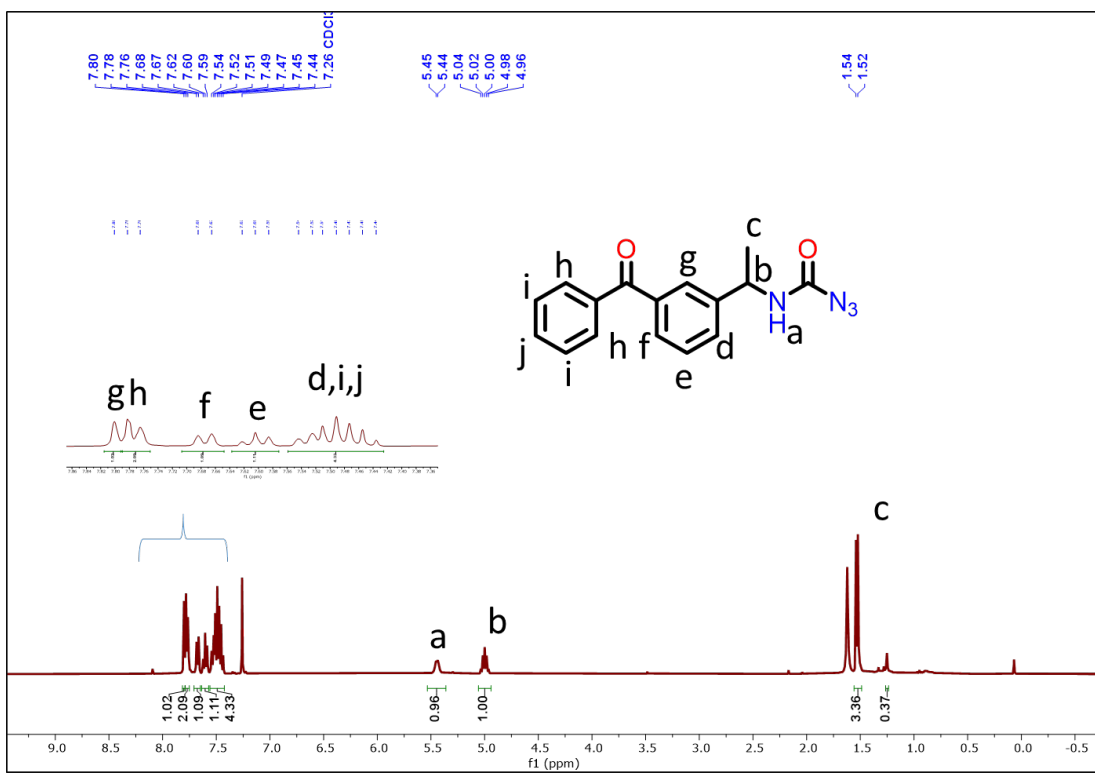

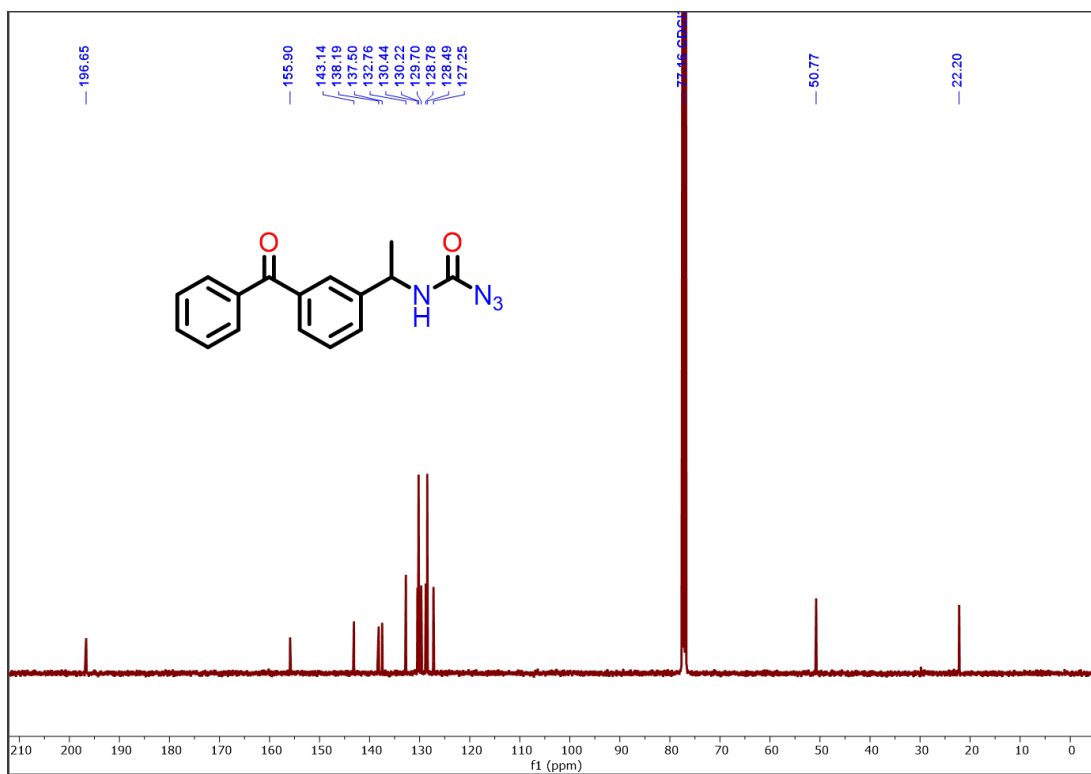

Fig. S6:  $^{13}\text{C}$  NMR of Keto-Az in  $\text{CDCl}_3$ .

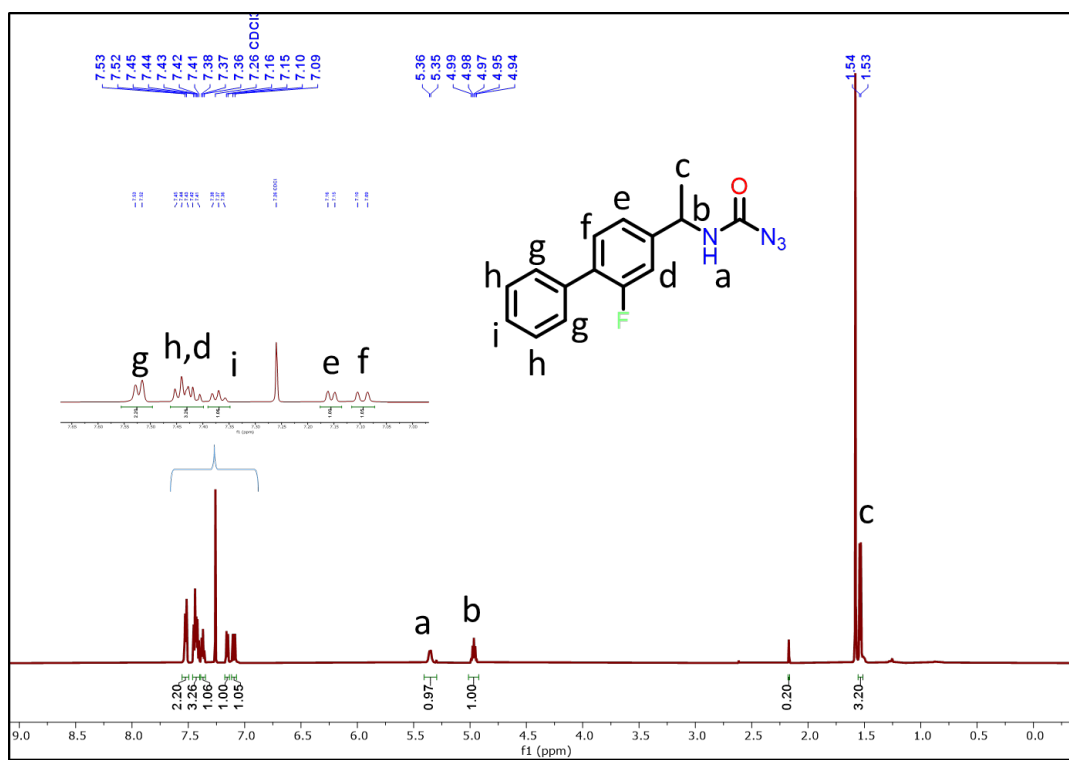

Fig. S7:  $^1\text{H}$  NMR of Flur-Az in  $\text{CDCl}_3$ .

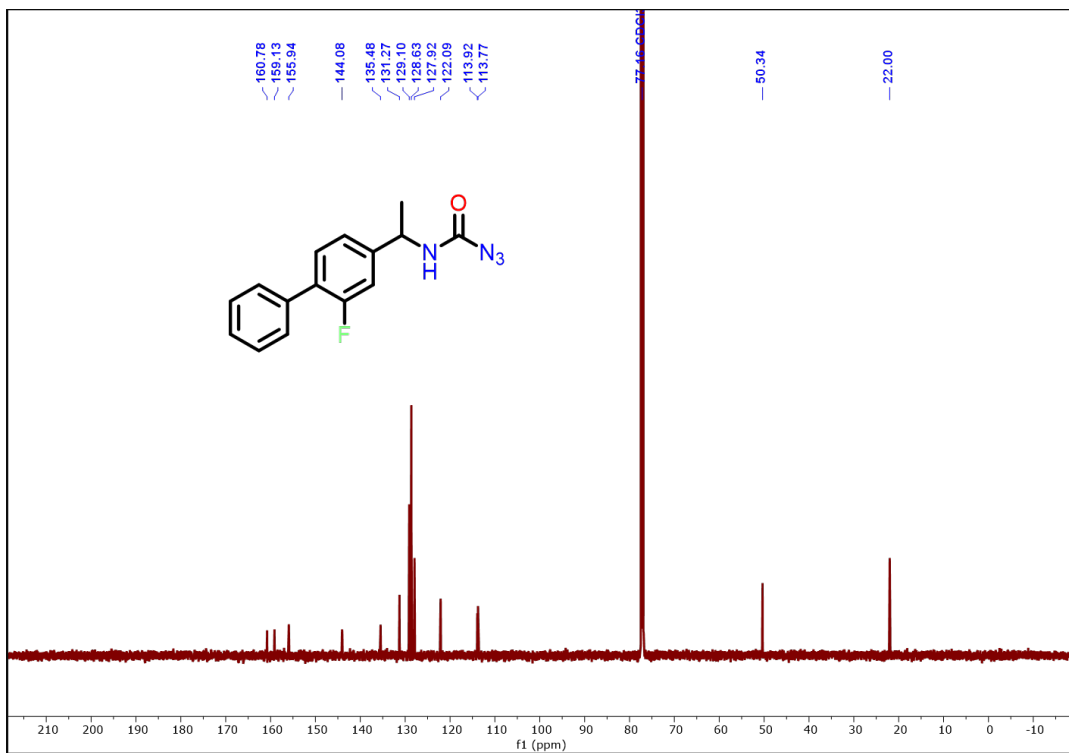

Fig. S8: <sup>13</sup>C NMR of Flur-Az in CDCl<sub>3</sub>.

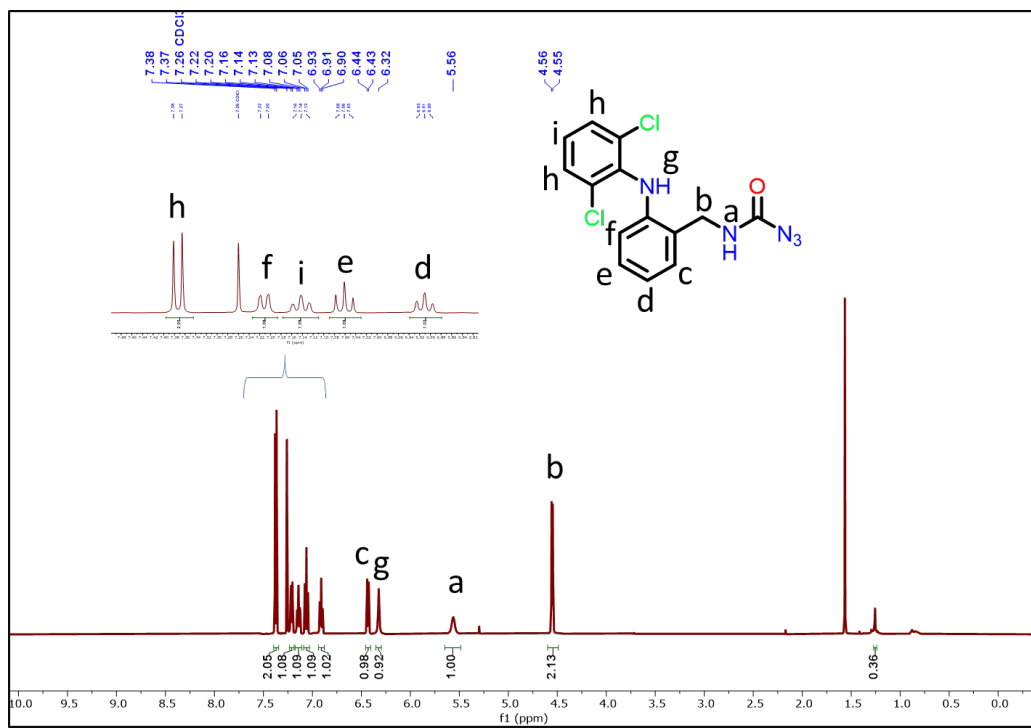

Fig. S9: <sup>1</sup>H NMR of Diclo-Az in CDCl<sub>3</sub>.

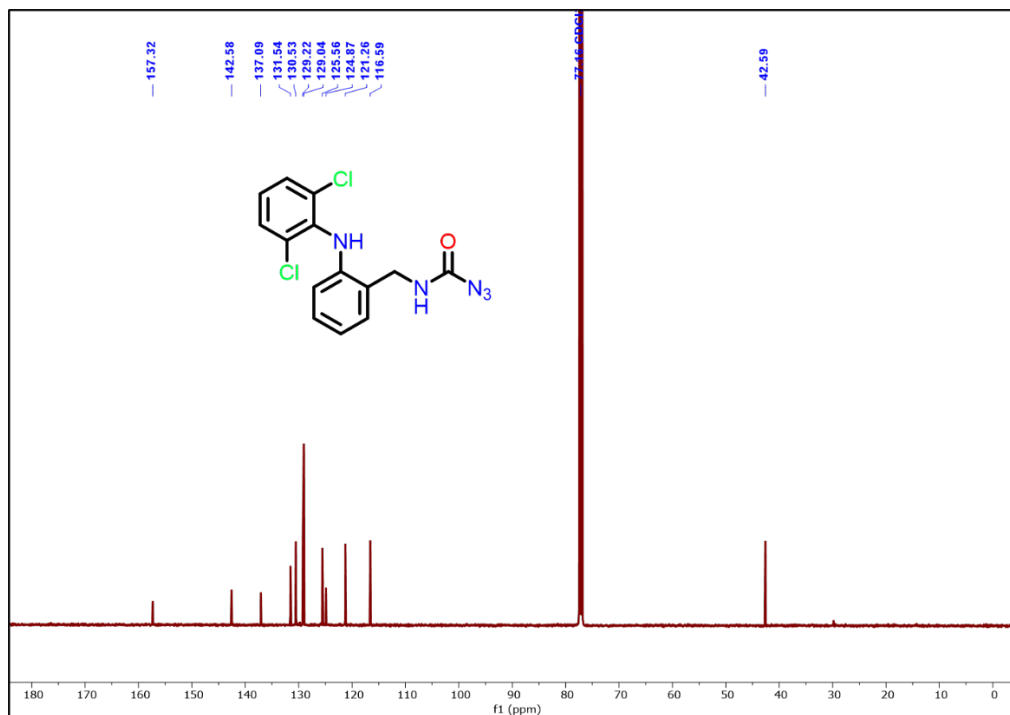

Fig. S10: <sup>13</sup>C NMR of Diclo-Az in CDCl<sub>3</sub>.

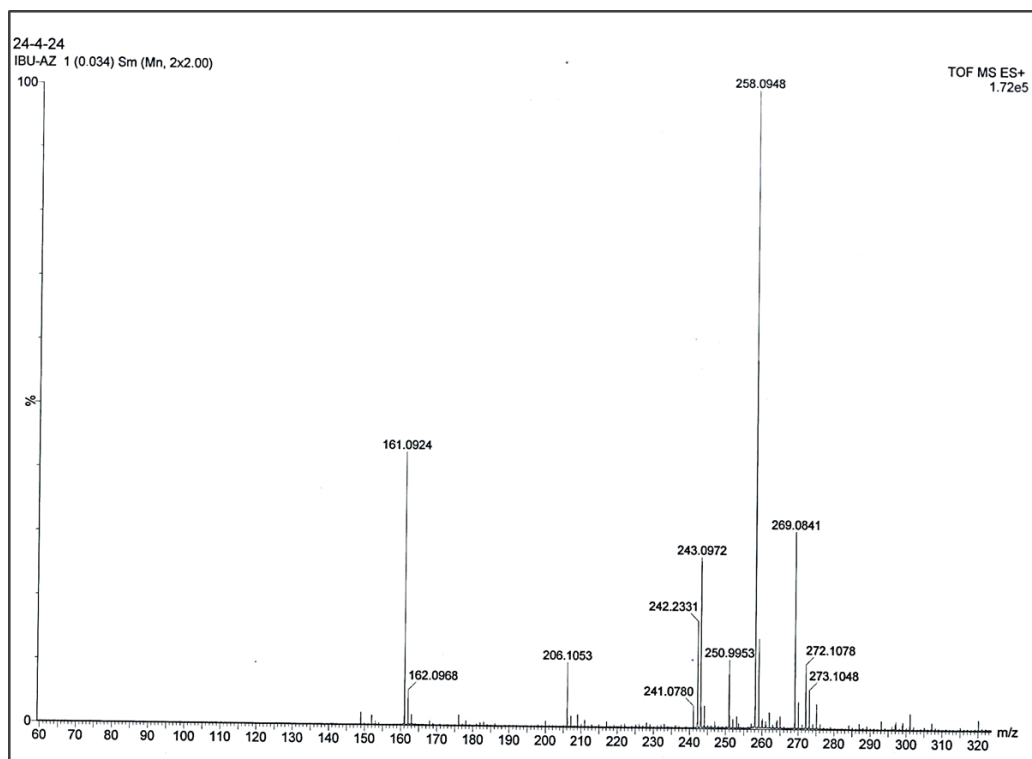

Fig. S11: HR-MASS of Ibu-Az obtained at [M+Na]<sup>+</sup>=269.08 m/z

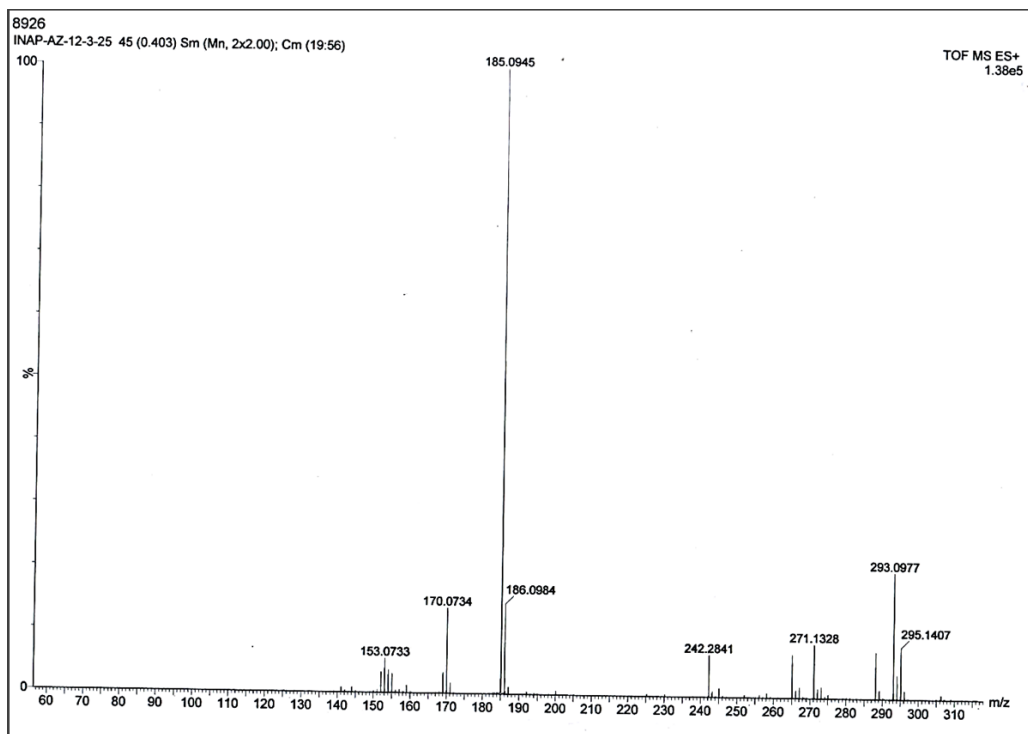

Fig. S12: HR-MASS of **Nap-Az** obtained at  $[M+Na]^+=293.09$  m/z

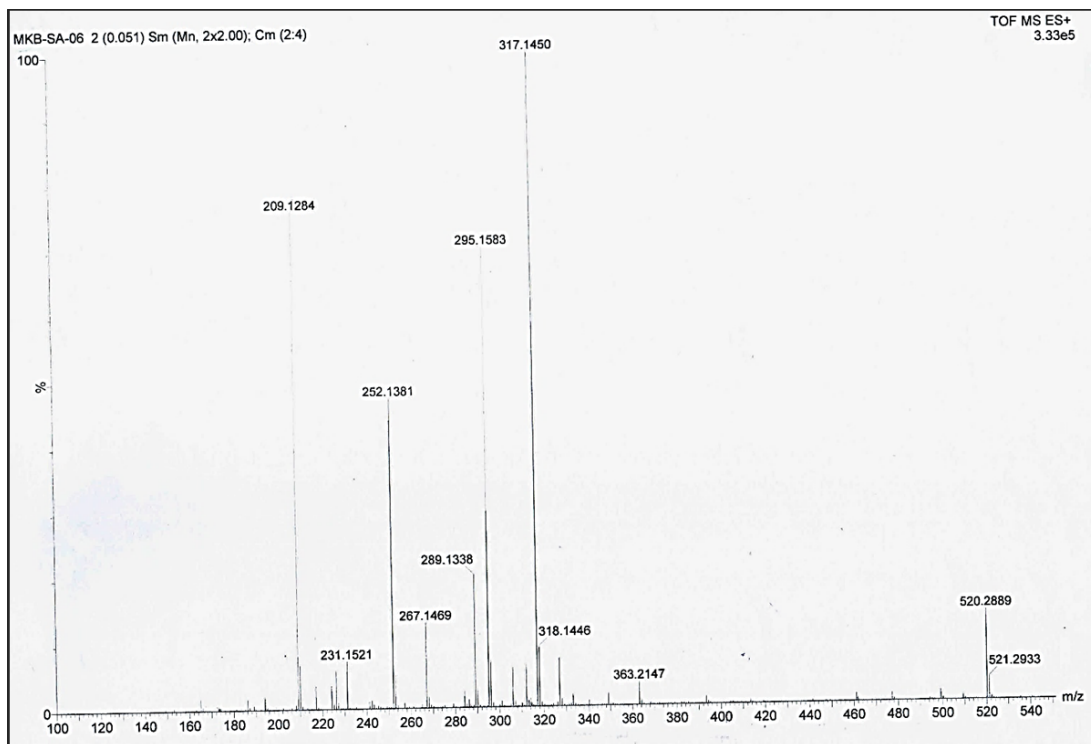

Fig. S13: HR-MASS of **Keto-Az** obtained at  $[M+Na]^+=317.14$  m/z

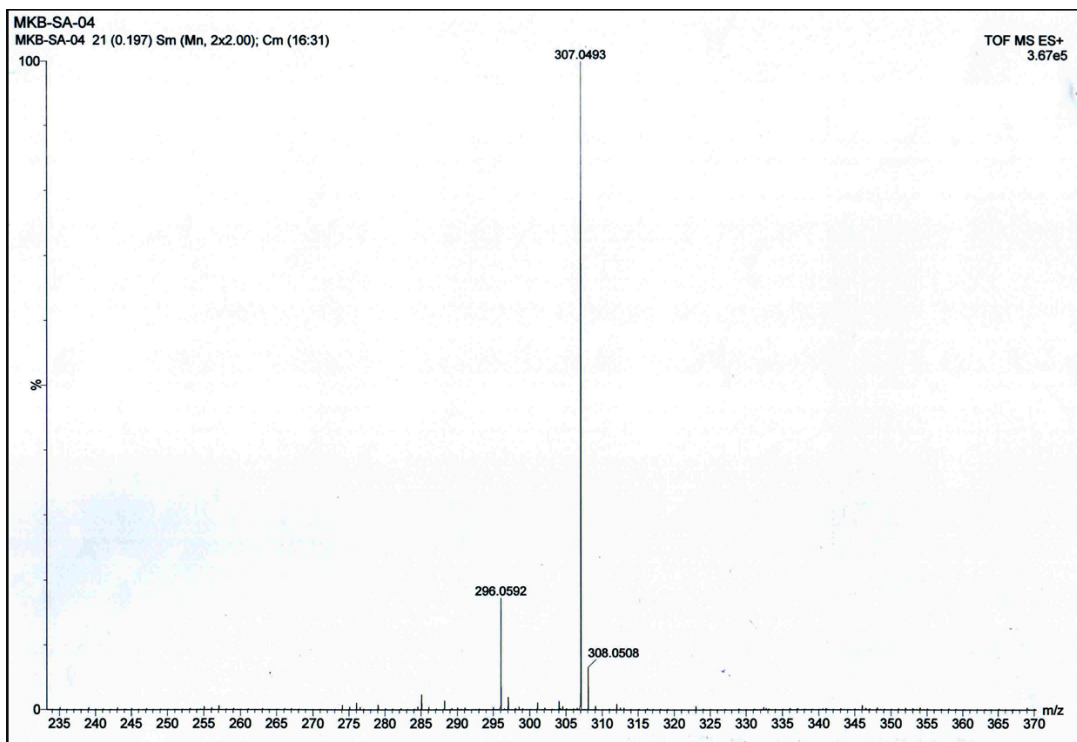

Fig. S14: HR-MASS of **Flur-Az** obtained at  $[M+Na]^+=307.04$  m/z

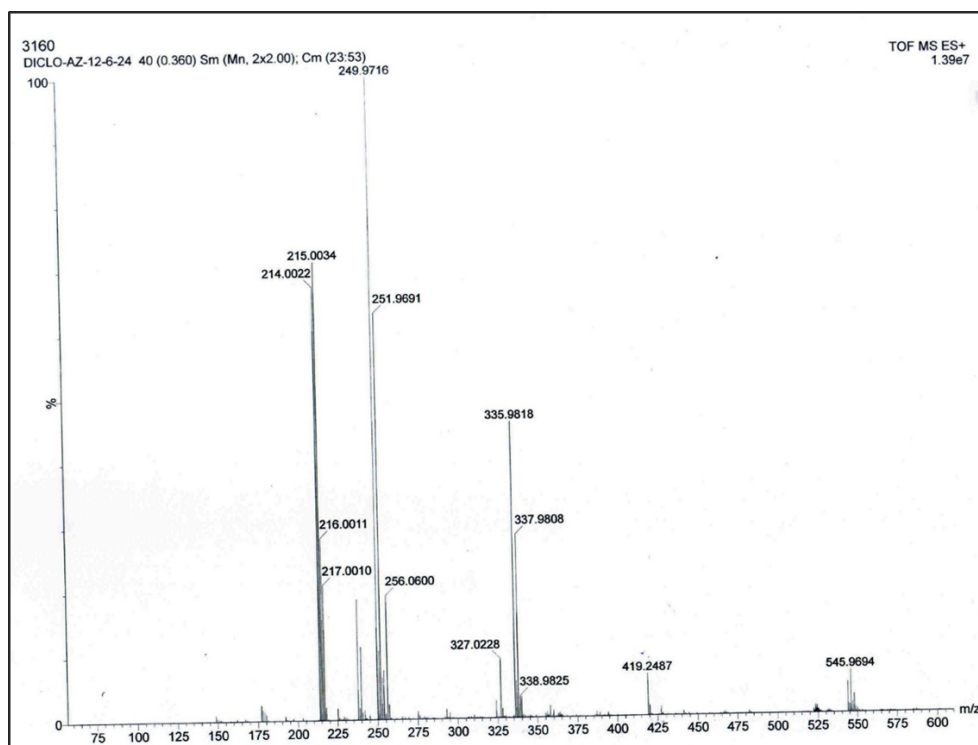

Fig. S15: HR-MASS of **Diclo-Az** obtained at  $[M+H]^+=335.98$  m/z

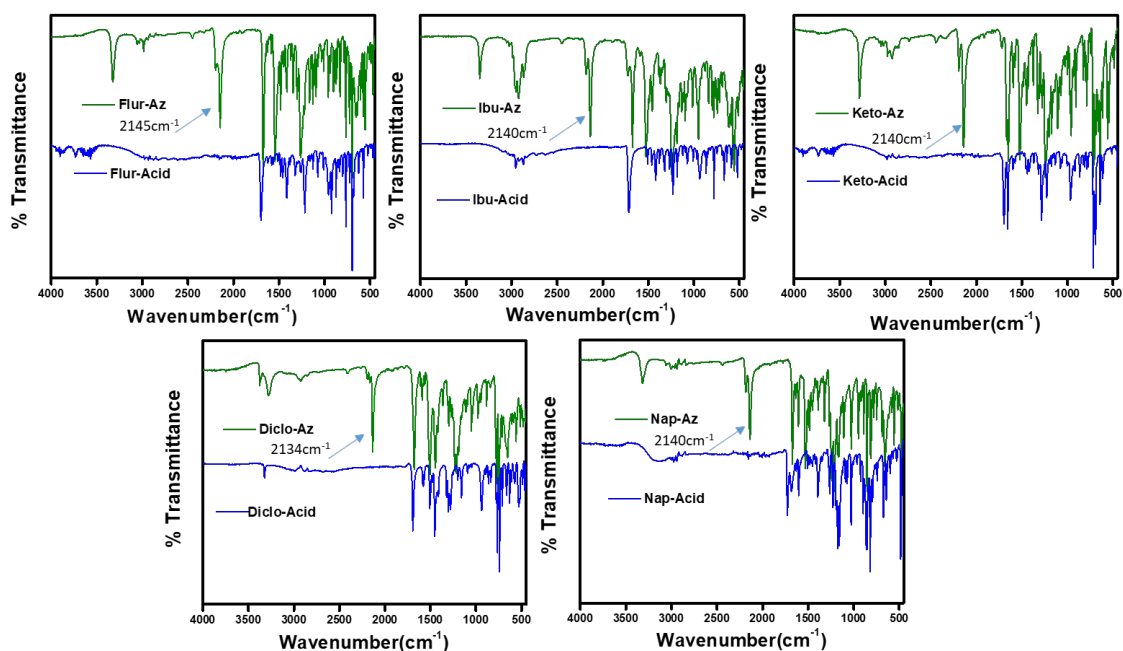

Fig. S16: FT-IR spectra of azides and corresponding precursor acids.

Table S1: Crystallographic data table:

| Identification Code | Ibu-Az                                           | Nap-Az                                                        | Keto-Az                                                       | Flur-Az                                                                      | Diclo-Az                                                         |
|---------------------|--------------------------------------------------|---------------------------------------------------------------|---------------------------------------------------------------|------------------------------------------------------------------------------|------------------------------------------------------------------|
| CCDC number         | 2049306                                          | 2049307                                                       | 2432622                                                       | 2049308                                                                      | 2362781                                                          |
| Empirical formula   | C <sub>13</sub> H <sub>18</sub> N <sub>4</sub> O | C <sub>14</sub> H <sub>14</sub> N <sub>4</sub> O <sub>2</sub> | C <sub>16</sub> H <sub>14</sub> N <sub>4</sub> O <sub>2</sub> | C <sub>30</sub> H <sub>23</sub> F <sub>2</sub> N <sub>8</sub> O <sub>2</sub> | C <sub>14</sub> H <sub>11</sub> Cl <sub>2</sub> N <sub>5</sub> O |
| Formula weight      | 246.31                                           | 270.29                                                        | 294.31                                                        | 565.56                                                                       | 336.18                                                           |
| Temperature/K       | 110.46                                           | 120.1                                                         | 159.97                                                        | 124.38                                                                       | 150.0                                                            |
| Crystal system      | triclinic                                        | monoclinic                                                    | monoclinic                                                    | triclinic                                                                    | monoclinic                                                       |
| Space group         | <i>P</i> -1                                      | <i>P</i> 2 <sub>1</sub> / <i>c</i>                            | <i>P</i> 2 <sub>1</sub> / <i>c</i>                            | <i>P</i> -1                                                                  | <i>P</i> 2 <sub>1</sub> / <i>c</i>                               |
| a/Å                 | 5.207(2)                                         | 13.9443(10)                                                   | 19.98(2)                                                      | 6.516(2)                                                                     | 14.073(9)                                                        |
| b/Å                 | 11.084(6)                                        | 5.2071(4)                                                     | 4.808(5)                                                      | 10.111(3)                                                                    | 4.879(3)                                                         |
| c/Å                 | 11.850(5)                                        | 18.4952(12)                                                   | 14.863(12)                                                    | 21.318(7)                                                                    | 22.444(14)                                                       |

|                                                |                                                               |                                                               |                                                              |                                                               |                                                               |
|------------------------------------------------|---------------------------------------------------------------|---------------------------------------------------------------|--------------------------------------------------------------|---------------------------------------------------------------|---------------------------------------------------------------|
| $\alpha/^\circ$                                | 98.187(17)                                                    | 90                                                            | 90                                                           | 91.568(5)                                                     | 90                                                            |
| $\beta/^\circ$                                 | 97.794(15)                                                    | 94.240(2)                                                     | 91.84(4)                                                     | 92.708(5)                                                     | 98.92(2)                                                      |
| $\gamma/^\circ$                                | 95.548(17)                                                    | 90                                                            | 90                                                           | 103.339(5)                                                    | 90                                                            |
| Volume/ $\text{\AA}^3$                         | 665.9(6)                                                      | 1339.25(17)                                                   | 1427(2)                                                      | 1363.9(8)                                                     | 1522.2(16)                                                    |
| Z                                              | 2                                                             | 4                                                             | 4                                                            | 2                                                             | 4                                                             |
| $\rho_{\text{calc}}/\text{g/cm}^3$             | 1.228                                                         | 1.341                                                         | 1.370                                                        | 1.377                                                         | 1.467                                                         |
| $\mu/\text{mm}^{-1}$                           | 0.082                                                         | 0.094                                                         | 0.094                                                        | 0.100                                                         | 0.435                                                         |
| F(000)                                         | 264.0                                                         | 568.0                                                         | 616.0                                                        | 586.0                                                         | 688.0                                                         |
| Crystal size/ $\text{mm}^3$                    | 0.18 × 0.16 × 0.12                                            | 0.2 × 0.18 × 0.14                                             | 0.06 × 0.04 × 0.04                                           | 0.2 × 0.18 × 0.12                                             | 0.12 × 0.07 × 0.05                                            |
| Radiation                                      | MoK $\alpha$ ( $\lambda = 0.71073$ )                          | MoK $\alpha$ ( $\lambda = 0.71073$ )                          | MoK $\alpha$ ( $\lambda = 0.71073$ )                         | MoK $\alpha$ ( $\lambda = 0.71073$ )                          | MoK $\alpha$ ( $\lambda = 0.71073$ )                          |
| 2 $\theta$ range for data collection/ $^\circ$ | 4.71 to 47.322                                                | 5.116 to 54.196                                               | 5.484 to 50.092                                              | 1.914 to 45.972                                               | 5.86 to 50.182                                                |
| Index ranges                                   | -5 ≤ h ≤ 5, -12 ≤ k ≤ 12, -13 ≤ l ≤ 13                        | -17 ≤ h ≤ 17, -6 ≤ k ≤ 6, -23 ≤ l ≤ 23                        | -23 ≤ h ≤ 23, 0 ≤ k ≤ 5, 0 ≤ l ≤ 17                          | -7 ≤ h ≤ 7, -11 ≤ k ≤ 11, -23 ≤ l ≤ 23                        | -16 ≤ h ≤ 16, -5 ≤ k ≤ 5, -26 ≤ l ≤ 26                        |
| Reflections collected                          | 5569                                                          | 13240                                                         | 2507                                                         | 20695                                                         | 12467                                                         |
| Independent reflections                        | 1995 [R <sub>int</sub> = 0.0910, R <sub>sigma</sub> = 0.1027] | 2946 [R <sub>int</sub> = 0.0822, R <sub>sigma</sub> = 0.0700] | 2507 [R <sub>int</sub> = 0.075, R <sub>sigma</sub> = 0.1779] | 3779 [R <sub>int</sub> = 0.1276, R <sub>sigma</sub> = 0.0985] | 2695 [R <sub>int</sub> = 0.0957, R <sub>sigma</sub> = 0.0773] |
| Data/restraints/parameters                     | 1995/0/166                                                    | 2946/0/183                                                    | 2507/0/201                                                   | 3779/0/385                                                    | 2695/0/199                                                    |
| Goodness-of-fit on F <sup>2</sup>              | 1.036                                                         | 1.051                                                         | 1.026                                                        | 1.141                                                         | 1.031                                                         |
| Final R indexes [ $I \geq 2\sigma(I)$ ]        | R <sub>1</sub> = 0.0647, wR <sub>2</sub> = 0.1646             | R <sub>1</sub> = 0.0487, wR <sub>2</sub> = 0.1227             | R <sub>1</sub> = 0.1227, wR <sub>2</sub> = 0.3035            | R <sub>1</sub> = 0.1198, wR <sub>2</sub> = 0.3398             | R <sub>1</sub> = 0.0624, wR <sub>2</sub> = 0.1568             |
| Final R indexes [all data]                     | R <sub>1</sub> = 0.0899, wR <sub>2</sub> = 0.1825             | R <sub>1</sub> = 0.0649, wR <sub>2</sub> = 0.1323             | R <sub>1</sub> = 0.1880, wR <sub>2</sub> = 0.3466            | R <sub>1</sub> = 0.1869, wR <sub>2</sub> = 0.3780             | R <sub>1</sub> = 0.0822, wR <sub>2</sub> = 0.1731             |
| Largest diff. peak/hole / e $\text{\AA}^{-3}$  | 0.23/-0.28                                                    | 0.19/-0.24                                                    | 0.42/-0.49                                                   | 0.62/-0.45                                                    | 0.40/-0.40                                                    |

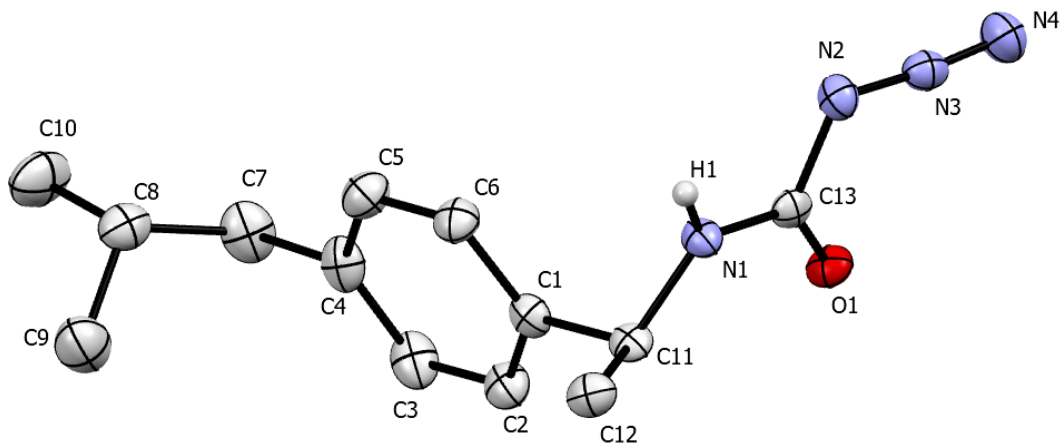

Fig. S17: ORTEP plot of Ibu-Az (50% probability)

Table S2: Hydrogen bonding table for Ibu-Az

| D-H...A     | d(D-H)/Å | d(H...A)/Å | d(D...A)/Å | ∠D-H...A/° | Symmetry |
|-------------|----------|------------|------------|------------|----------|
| N1--H1...O1 | 0.88     | 2.18       | 3.014(3)   | 157        | -1+x,y,z |

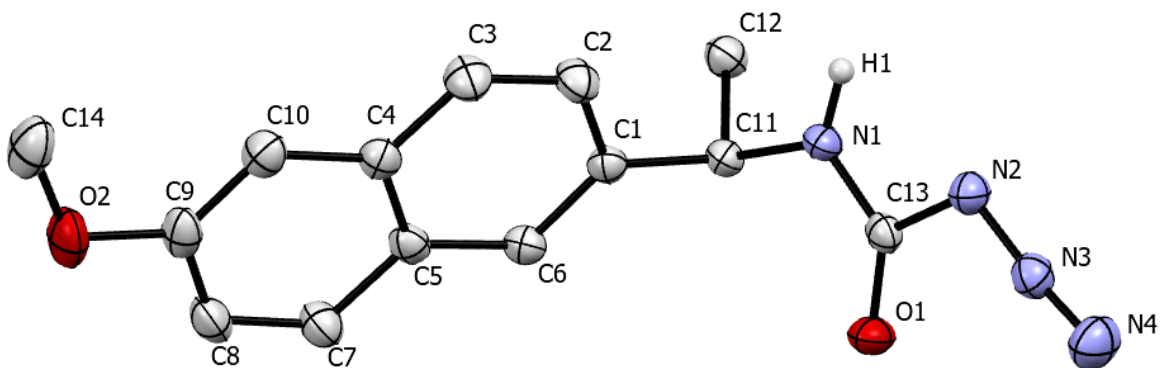

Fig. S18: ORTEP plot of Nap-Az (50% probability)

Table S3: Hydrogen bonding table for Nap-Az

| D-H...A    | d(D-H)/Å | d(H...A)/Å | d(D...A)/Å | ∠D-H...A/° | Symmetry |
|------------|----------|------------|------------|------------|----------|
| N1-H1...O1 | 0.88     | 2.18       | 3.0253(19) | 160        | x,1+y,z  |

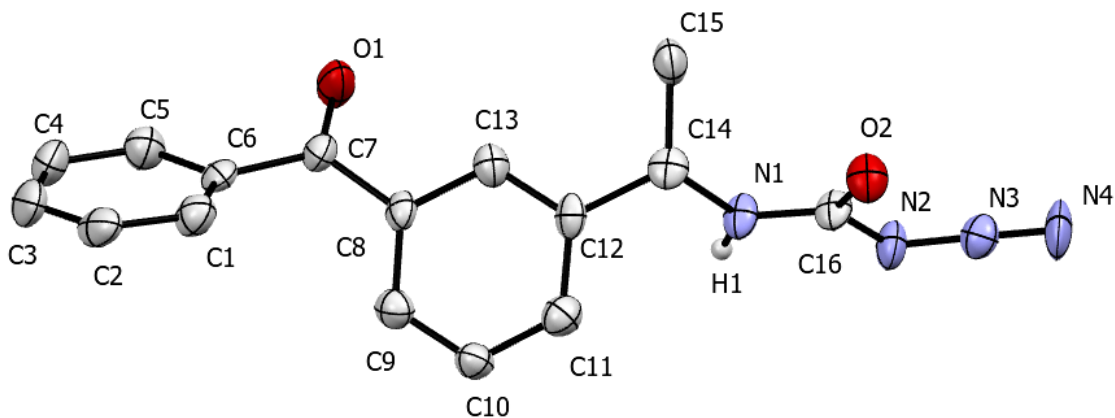

Fig. S19: ORTEP plot of **Keto-Az** (50% probability)

Table S4: Hydrogen bonding table for **Keto-Az**

| D-H...A    | d(D-H)/Å | d(H...A)/Å | d(D...A)/Å | ∠D-H...A/° | Symmetry |
|------------|----------|------------|------------|------------|----------|
| N1-H1...O2 | 0.88     | 2.02       | 2.877(8)   | 165        | x,-1+y,z |

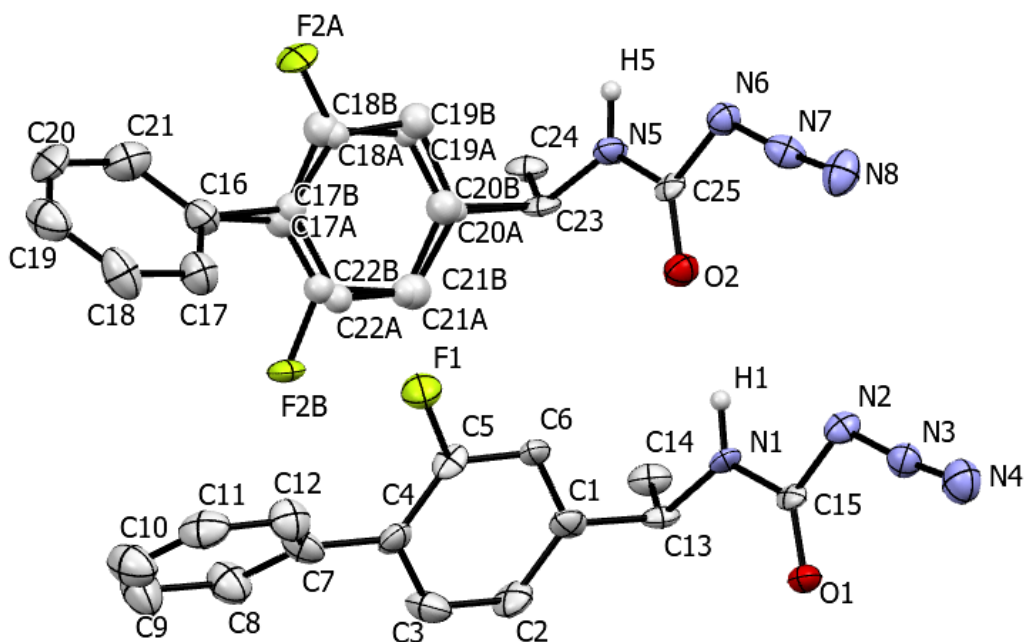

Fig. S20: ORTEP plot of **Flur-Az** (50% probability)

**Table S5:** Hydrogen bonding table for **Flur-Az**

| D-H...A    | d(D-H)/Å | d(H...A)/Å | d(D...A)/Å | ∠D-H...A/° | Symmetry |
|------------|----------|------------|------------|------------|----------|
| N1-H1...O2 | 0.88     | 2.04       | 2.895(11)  | 164        | x,-1+y,z |

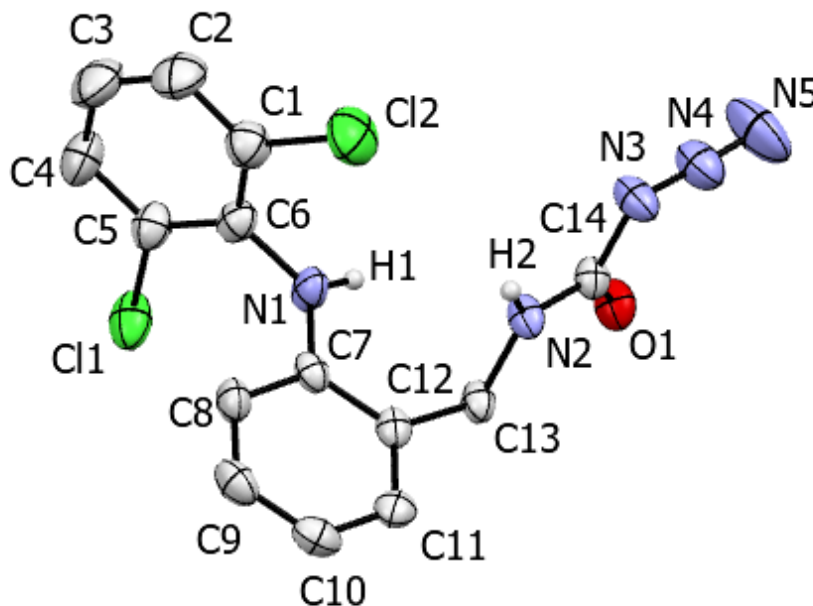

**Fig. S21:** ORTEP plot of **Diclo-Az** (50% probability)

**Table S6:** Hydrogen bonding table for **Diclo-Az**

| D-H...A     | d(D-H)/Å | d(H...A)/Å | d(D...A)/Å | ∠D-H...A/° | Symmetry |
|-------------|----------|------------|------------|------------|----------|
| N2-H2...O1  | 0.88     | 2.05       | 2.879(4)   | 156        | x,1+y,z  |
| N1-H1...Cl2 | 0.95     | 2.80       | 3.607(4)   | 144        | x,1+y,z  |

Reaction Scheme:

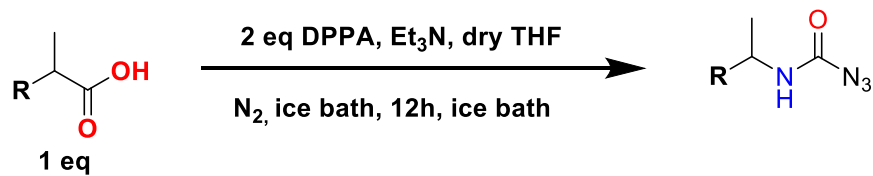

Mechanism:

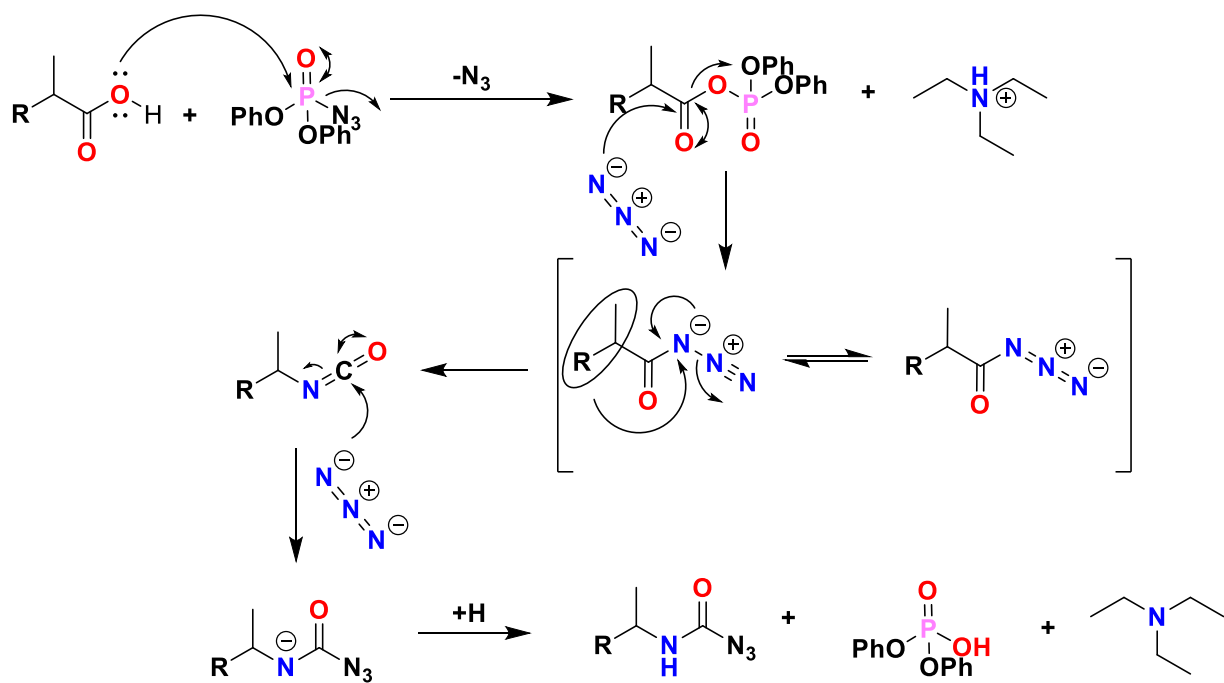

Fig. S22: Reaction Scheme and mechanism of carbamoyl azide.

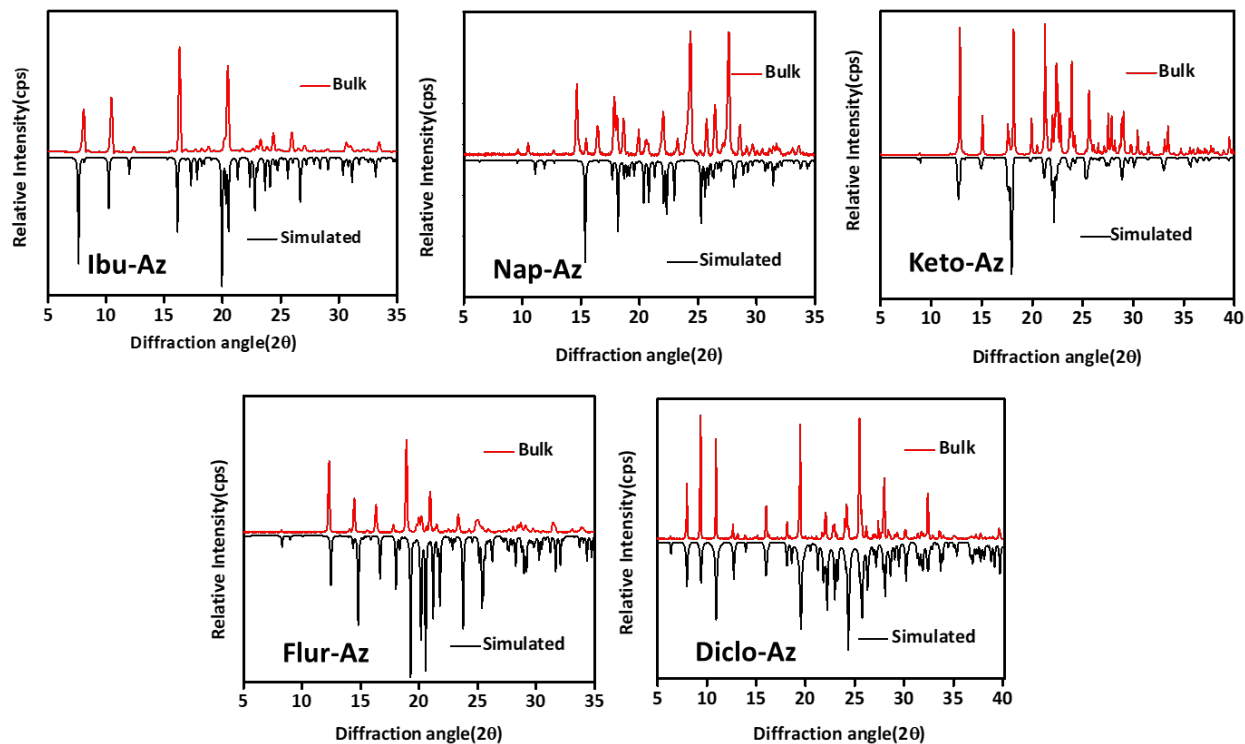

Fig. S23: PXRD plots of azides (bulk vs. simulated).

Table S7: Gelation table

| Compound | Gelation Solvent (conc. 4 wt.% at RT) |       |     |     |                    |      |     |            |                   |               |
|----------|---------------------------------------|-------|-----|-----|--------------------|------|-----|------------|-------------------|---------------|
|          | DMSO:H <sub>2</sub> O(1:1)            | WATER | DCM | THF | CH <sub>3</sub> CN | DMSO | DMF | 1,4-Dioxan | Methyl salicylate | Nitro-benzene |
| Diclo-Az | G                                     | INS   | S   | S   | S                  | S    | S   | S          | P                 | S             |
| Nap-Az   | G                                     | INS   | S   | S   | S                  | S    | S   | S          | P                 | S             |
| Flur-Az  | GP                                    | INS   | S   | S   | S                  | S    | S   | S          | S                 | S             |
| Ibu-Az   | P                                     | INS   | S   | S   | S                  | S    | S   | S          | S                 | S             |
| Keto-Az  | S                                     | INS   | S   | S   | S                  | S    | S   | S          | P                 | S             |

G=Gel, INS=Insoluble, S=Soluble, P=Precipitate, GP=Gelatinous Precipitate

**Table S8:** M.G.C and  $\tan\delta$  ( $G''/G'$ ) table

| Gel      | $G''$ (Pa) | $G'$ (Pa) | $\tan\delta$ ( $G''/G'$ ) | Minimum Gelator Conc.(M.G.C) |
|----------|------------|-----------|---------------------------|------------------------------|
| Diclo-Az | 444        | 8010      | 0.05                      | 1.8 wt% (18mg/ml)            |
| Nap-Az   | 774        | 9640      | 0.08                      | 3.2wt% (32mg/ml)             |

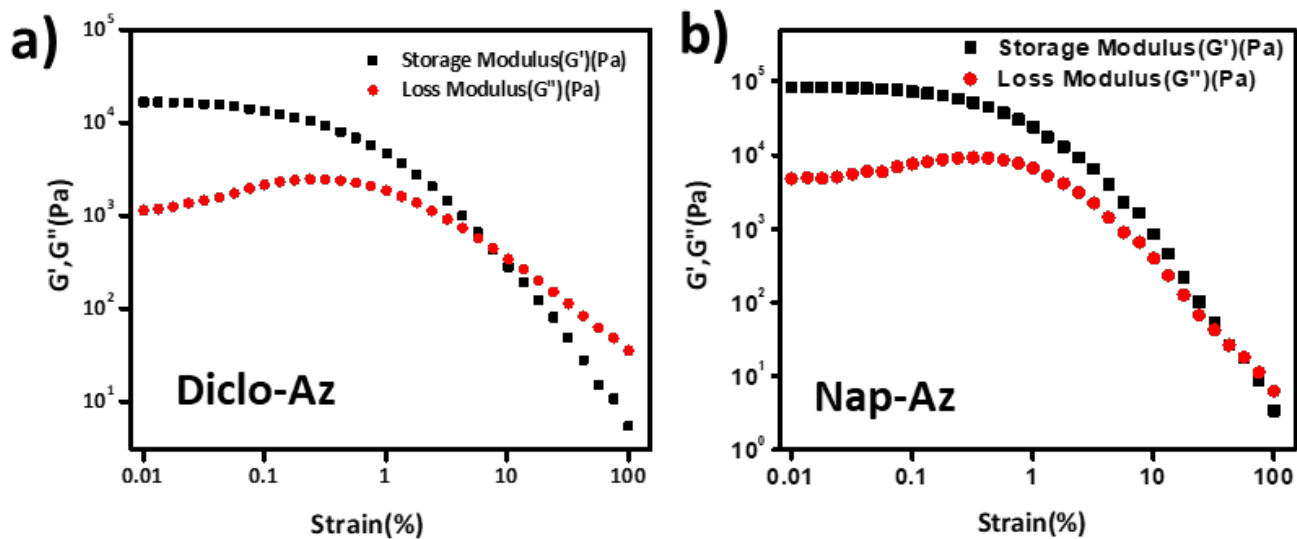

**Fig. S24:** Amplitude-sweep experiments of 4 wt.% of DMSO:H<sub>2</sub>O (1:1) gels: (a) Diclo-Az and (b) Nap-Az

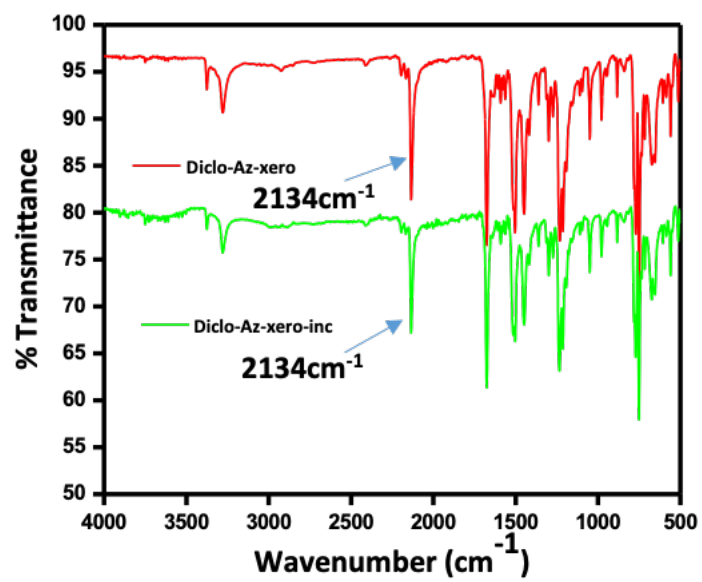

**Fig. S25:** FT-IR spectra of xerogel of **Diclo-Az** and xerogel of **Diclo-Az**-incubated at 37 °C for 24h.

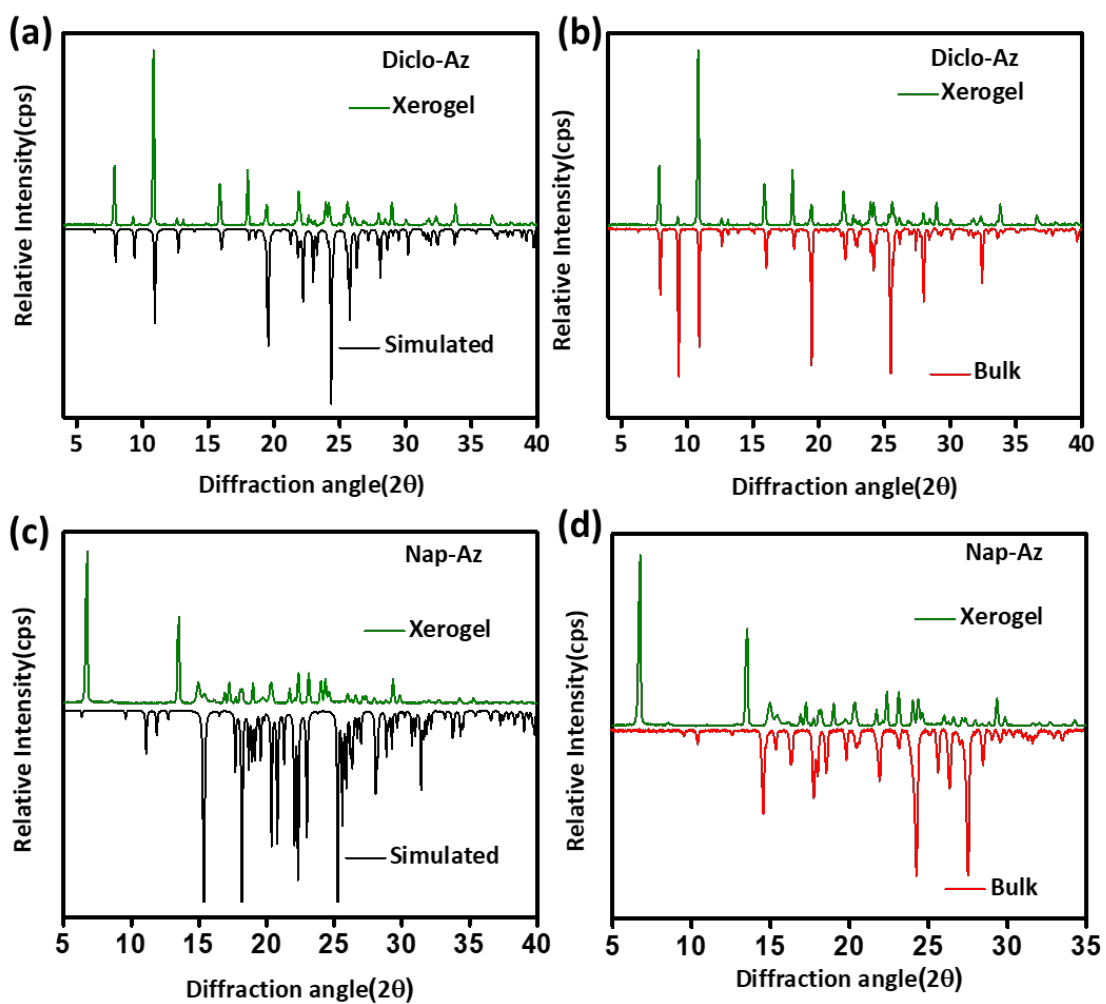

Fig. S26: PXRD Patterns (xerogel vs. bulk, xerogel vs. simulated) of (a, b) Diclo-Az and (c, d) Nap-Az

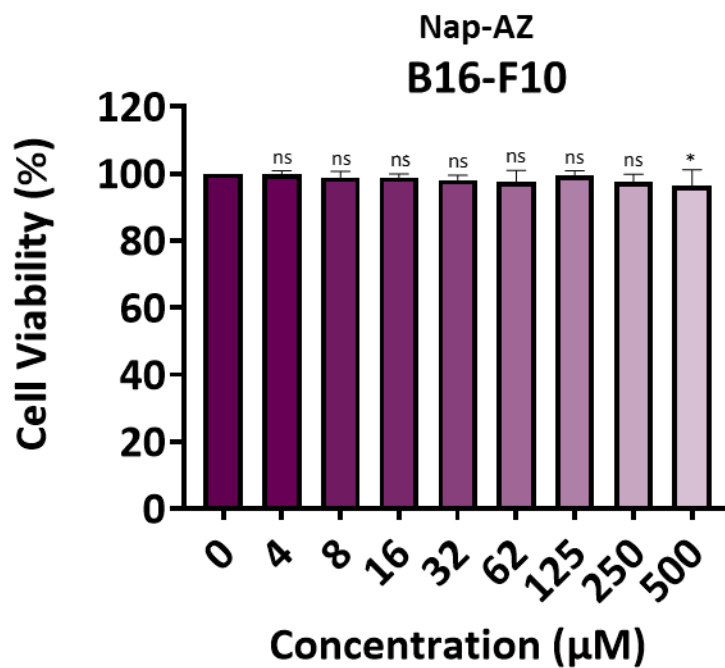

**Fig. S27:** MTT Assay on B16-F10 for **Nap-Az**. Data are represented considering mean  $\pm$  SD of the replicates where \* $P < 0.05$ , \*\* $P < 0.01$  and \*\*\* $P < 0.001$  and ns represents nonsignificant.

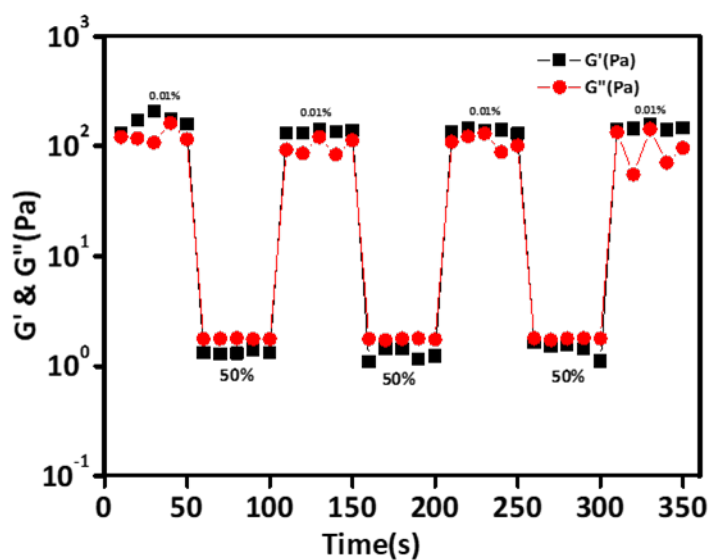

**Fig. S28:** Rheo-reversibility of **Nap-Az** (4 wt%, DMSO/water, 1:1, v/v)
